# Supplementary material
Source: publisher site journal article supplement (https://dez.pensoft.net/article/55732/download/suppl/310/)
Supplement: Supplementary file 1

**Appendix 10** Pairwise genetic mean p distances (%) between the examined individuals of the European species of the *Colletes succinctus* group, based on the individuals investigated.

|                               | P3   | BK1  | BK2  | BK3  | BK4  | BK5  | 7346 | 7345 | BK6  | BK7  | BK8  | BK9  | BK25 | BK26 | BK28 | BK23 | BK29 | BK30 | BK37 | BK38 |
|-------------------------------|------|------|------|------|------|------|------|------|------|------|------|------|------|------|------|------|------|------|------|------|
| P3 ( <i>C. hederæ</i> )       |      |      |      |      |      |      |      |      |      |      |      |      |      |      |      |      |      |      |      |      |
| BK1 ( <i>C. hederæ</i> )      | 0.32 |      |      |      |      |      |      |      |      |      |      |      |      |      |      |      |      |      |      |      |
| BK2 ( <i>C. hederæ</i> )      | 0.64 | 0.95 |      |      |      |      |      |      |      |      |      |      |      |      |      |      |      |      |      |      |
| BK3 ( <i>C. succinctus</i> )  | 0.64 | 0.95 | 0.00 |      |      |      |      |      |      |      |      |      |      |      |      |      |      |      |      |      |
| BK4 ( <i>C. succinctus</i> )  | 0.64 | 0.95 | 0.00 | 0.00 |      |      |      |      |      |      |      |      |      |      |      |      |      |      |      |      |
| BK5 ( <i>C. succinctus</i> )  | 0.64 | 0.95 | 0.00 | 0.00 | 0.00 |      |      |      |      |      |      |      |      |      |      |      |      |      |      |      |
| 7346 ( <i>C. succinctus</i> ) | 0.16 | 0.48 | 0.79 | 0.79 | 0.79 | 0.79 |      |      |      |      |      |      |      |      |      |      |      |      |      |      |
| 7345 ( <i>C. succinctus</i> ) | 0.16 | 0.48 | 0.79 | 0.79 | 0.79 | 0.79 | 0.32 |      |      |      |      |      |      |      |      |      |      |      |      |      |
| BK6 ( <i>C. collaris</i> )    | 5.25 | 5.25 | 5.09 | 5.09 | 5.09 | 5.09 | 5.09 | 5.41 |      |      |      |      |      |      |      |      |      |      |      |      |
| BK7 ( <i>C. collaris</i> )    | 5.09 | 5.09 | 4.93 | 4.93 | 4.93 | 4.93 | 4.93 | 5.25 | 0.16 |      |      |      |      |      |      |      |      |      |      |      |
| BK8 ( <i>C. collaris</i> )    | 5.25 | 5.25 | 5.09 | 5.09 | 5.09 | 5.09 | 5.09 | 5.41 | 0.16 | 0.32 |      |      |      |      |      |      |      |      |      |      |
| BK9 ( <i>C. collaris</i> )    | 5.25 | 5.25 | 5.09 | 5.09 | 5.09 | 5.09 | 5.09 | 5.41 | 0.16 | 0.32 | 0.00 |      |      |      |      |      |      |      |      |      |
| BK25 ( <i>C. pannonicus</i> ) | 0.32 | 0.64 | 0.48 | 0.48 | 0.48 | 0.48 | 0.48 | 0.48 | 4.93 | 4.77 | 4.93 | 4.93 |      |      |      |      |      |      |      |      |
| BK26 ( <i>C. pannonicus</i> ) | 0.48 | 0.79 | 0.48 | 0.48 | 0.48 | 0.48 | 0.32 | 0.64 | 4.77 | 4.61 | 4.77 | 4.77 | 0.48 |      |      |      |      |      |      |      |
| BK28 ( <i>C. brevigena</i> )  | 0.00 | 0.32 | 0.64 | 0.64 | 0.64 | 0.64 | 0.16 | 0.16 | 5.25 | 5.09 | 5.25 | 5.25 | 0.32 | 0.48 |      |      |      |      |      |      |
| BK23 ( <i>C. brevigena</i> )  | 0.32 | 0.64 | 0.64 | 0.64 | 0.64 | 0.64 | 0.48 | 0.48 | 5.25 | 5.09 | 5.25 | 5.25 | 0.64 | 0.48 | 0.32 |      |      |      |      |      |
| BK29 ( <i>C. brevigena</i> )  | 0.64 | 0.95 | 0.00 | 0.00 | 0.00 | 0.00 | 0.79 | 0.79 | 5.09 | 4.93 | 5.09 | 5.09 | 0.48 | 0.48 | 0.64 | 0.64 |      |      |      |      |
| BK30 ( <i>C. brevigena</i> )  | 0.00 | 0.32 | 0.64 | 0.64 | 0.64 | 0.64 | 0.16 | 0.16 | 5.25 | 5.09 | 5.25 | 5.25 | 0.32 | 0.48 | 0.00 | 0.32 | 0.64 |      |      |      |
| BK37 ( <i>C. brevigena</i> )  | 0.32 | 0.32 | 0.95 | 0.95 | 0.95 | 0.95 | 0.48 | 0.48 | 5.25 | 5.09 | 5.25 | 5.25 | 0.64 | 0.79 | 0.32 | 0.64 | 0.95 | 0.32 |      |      |
| BK38 ( <i>C. brevigena</i> )  | 0.16 | 0.48 | 0.48 | 0.48 | 0.48 | 0.48 | 0.32 | 0.32 | 5.09 | 4.93 | 5.09 | 5.09 | 0.16 | 0.32 | 0.16 | 0.48 | 0.48 | 0.16 | 0.48 |      |
| 7348 ( <i>C. creticus</i> )   | 6.84 | 6.84 | 6.84 | 6.84 | 6.84 | 6.84 | 7.00 | 7.00 | 7.95 | 7.79 | 7.95 | 7.95 | 6.84 | 6.68 | 6.84 | 6.84 | 6.84 | 6.84 | 6.68 | 6.68 |
